RESEARCH ARTICLE

# Accurate Identification of Common Pathogenic *Nocardia* Species: Evaluation of a Multilocus Sequence Analysis Platform and Matrix-Assisted Laser Desorption Ionization-Time of Flight Mass Spectrometry

Meng Xiao<sup>1</sup>✉, Lu Pang<sup>1,2</sup>✉, Sharon C-A. Chen<sup>3</sup>, Xin Fan<sup>1</sup>, Li Zhang<sup>1</sup>, Hai-Xia Li<sup>2</sup>, Xin Hou<sup>1</sup>, Jing-Wei Cheng<sup>1</sup>, Fanrong Kong<sup>3</sup>, Yu-Pei Zhao<sup>4</sup>, Ying-Chun Xu<sup>1</sup>\*

**1** Department of Clinical Laboratory, Peking Union Medical College Hospital, Chinese Academy of Medical Sciences, Beijing, China, **2** Department of Clinical Laboratory, Peking University First Hospital, Beijing, China, **3** Centre for Infectious Diseases and Microbiology Laboratory Services, ICPMR–Pathology West, Westmead Hospital, University of Sydney, Westmead, New South Wales, Australia, **4** Department of General Surgery, Peking Union Medical College Hospital, Chinese Academy of Medical Sciences, Beijing, China

✉ These authors contributed equally to this work.

\* [xycpumch@139.com](mailto:xycpumch@139.com)

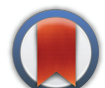

CrossMark  
click for updates

OPEN ACCESS

**Citation:** Xiao M, Pang L, Chen SC-A, Fan X, Zhang L, Li H-X, et al. (2016) Accurate Identification of Common Pathogenic *Nocardia* Species: Evaluation of a Multilocus Sequence Analysis Platform and Matrix-Assisted Laser Desorption Ionization-Time of Flight Mass Spectrometry. PLoS ONE 11(1): e0147487. doi:10.1371/journal.pone.0147487

**Editor:** Patrick CY Woo, The University of Hong Kong, HONG KONG

**Received:** November 29, 2015

**Accepted:** January 5, 2016

**Published:** January 25, 2016

**Copyright:** © 2016 Xiao et al. This is an open access article distributed under the terms of the [Creative Commons Attribution License](https://creativecommons.org/licenses/by/4.0/), which permits unrestricted use, distribution, and reproduction in any medium, provided the original author and source are credited.

**Data Availability Statement:** The DNA sequences of the 16S rRNA, secA1, gyrB, rpoB and hsp65 genes of 25 *Nocardia* isolates studied have been submitted to GenBank database (accession numbers KT985911 to KT985935, KU052160 to KU052184, KU052085 to KU052109, KU052135 to KU052159 and KU052110 to KU052134 for the above five genes, respectively).

**Funding:** The study was supported by a National Research Special Fund for Public Welfare Industry of Health of China (grant number 201402001, <http://www.nhfp.gov.cn>) and a National High Technology

## Abstract

Species identification of *Nocardia* is not straightforward due to rapidly evolving taxonomy, insufficient discriminatory power of conventional phenotypic methods and also of single gene locus analysis including 16S rRNA gene sequencing. Here we evaluated the ability of a 5-locus (16S rRNA, *gyrB*, *secA1*, *hsp65* and *rpoB*) multilocus sequence analysis (MLSA) approach as well as that of matrix-assisted laser desorption ionization-time of flight mass spectrometry (MALDI-TOF MS) in comparison with sequencing of the 5'-end 606 bp partial 16S rRNA gene to provide identification of 25 clinical isolates of *Nocardia*. The 5'-end 606 bp 16S rRNA gene sequencing successfully assigned 24 of 25 (96%) clinical isolates to species level, namely *Nocardia cyriacigeorgica* (n = 12, 48%), *N. farcinica* (n = 9, 36%), *N. abscessus* (n = 2, 8%) and *N. otitidiscaeviarum* (n = 1, 4%). MLSA showed concordance with 16S rRNA gene sequencing results for the same 24 isolates. However, MLSA was able to identify the remaining isolate as *N. wallacei*, and clustered *N. cyriacigeorgica* into three subgroups. None of the clinical isolates were correctly identified to the species level by MALDI-TOF MS analysis using the manufacturer-provided database. A small “in-house” spectral database was established incorporating spectra of five clinical isolates representing the five species identified in this study. After complementation with the “in-house” database, of the remaining 20 isolates, 19 (95%) were correctly identified to species level (score  $\geq 2.00$ ) and one (an *N. abscessus* strain) to genus level (score  $\geq 1.70$  and  $< 2.00$ ). In summary, MLSA showed superior discriminatory power compared with the 5'-end 606 bp partial 16S rRNA gene sequencing for species identification of *Nocardia*. MALDI-TOF MS can provide rapid and accurate identification but is reliant on a robust mass spectra database.

Research and Development Program of China (the "863" Program, grant number 2013AA020203, <http://program.most.gov.cn>). The funders had no role in study design, data collection and analysis, decision to publish, or preparation of the manuscript.

**Competing Interests:** The authors have declared that no competing interests exist.

## Introduction

*Nocardia* species are ubiquitous environmental bacteria that cause suppurative infections in humans, including in the lung, central nervous system and skin [1]. Nocardiosis typically occurs in immunosuppressed patients such as organ and stem cell transplantation, and malignancy, but also affects immunocompetent hosts [2–4]. Since there are species-specific differences with regard to geography and disease patterns, identification of *Nocardia* to species level is important to determine both epidemiology and clinical associations.

Conventional culture identification of *Nocardia* based on phenotypic methods and distinct (but limited) antimicrobial susceptibility profiles lacks sufficient discriminatory power, is slow and time-consuming and requires staff expertise [5, 6]. Thus identification of *Nocardia* isolates by molecular methods is increasingly used, of which PCR-based methods combined with DNA sequencing are the most popular. Of these, 16S rRNA gene sequencing is considered the "gold-standard" [6, 7]. However, 16S rRNA gene sequencing is unable to distinguish certain closely related species due to insufficient interspecies gene polymorphisms [6, 8], whilst also unable to resolve certain species, e.g. *Nocardia nova* due to the presence of multiple yet different copies of this gene [9]. To overcome this limitation, other gene polymorphisms have been evaluated, such as those within the  $\beta$ -subunit of the type II DNA topoisomerase gene (*gyrB*) [10, 11], the subunit A of the SecA preprotein translocase gene (*secA1*) [12, 13], the 65-kDa heat shock protein gene (*hsp65*) [14, 15], and the  $\beta$  subunit of DNA-dependent RNA polymerase gene (*rpoB*) [11]. A multilocus sequence analysis (MLSA) scheme analyzing sequence polymorphisms of multiple *Nocardia* genes was reported to be accurate not only for the identification of known *Nocardia* species but the unveiling of novel species [16].

Other than genomic approaches, proteomic methods, most notably matrix-assisted laser desorption ionization-time of flight mass spectrometry (MALDI-TOF MS) method, have also been evaluated to identify *Nocardia* species in clinical laboratories. However, the presence of aliphatic acids in the cell wall of *Nocardia* has posed an obstacle in achieving satisfactory protein profiles. Furthermore, although improvements are continuing, many databases provided by commercial MALDI-TOF MS systems contain only a limited number of archived *Nocardia* spectral profiles [17, 18]. Previous studies have reported identification to species level in only 14.9–80.4% of isolates [18–23]. Complementation with profiles provided by "in-house" databases, which in turn relies on knowledge of local epidemiology, hence may assist with identification to the species, or even, genus level.

In the present study, we firstly evaluated a published MLSA scheme [16] employing polymorphisms in the 16S rRNA, *gyrB*, *secA1*, *hsp65* and *rpoB* loci for the identification of clinical *Nocardia* isolates in our laboratory; and secondly, determined the ability of MALDI-TOF MS for species assignment. Results were compared to those obtained by the 5'-end 606 bp 16S rRNA gene sequencing. An "in-house" database of *Nocardia* protein profiles was established and evaluated for its ability to complement a commercial database for identification of *Nocardia* species.

## Materials and Methods

### Ethics

The study was approved by the Human Research Ethics Committee of Peking Union Medical College Hospital (PUMCHBC-C-2-Q01-1). Written informed consent was obtained from patients for the use of the samples in research.

### *Nocardia* strains and reference sequences

Twenty-five clinical strains were studied in the evaluation of the ability of an MLSA scheme [16] and MALDI-TOF MS to provide species identification. Isolates were cultured from patients admitted to

the Peking Union Medical College Hospital from January 2009 to January 2015 (Table 1). All isolates were identified by standard phenotypic methods [24]. Isolates were stored at -80°C and subcultured on Columbia blood agar for 72 h to 96 h at 37°C to ensure adequate growth before study.

In addition, the GenBank sequences of 16S rRNA, *gyrB*, *secA1*, *hsp65* and *rpoB* loci corresponding to 20 *Nocardia* type strains were studied as the “validation cohort” to determine the ability of the MLSA typing scheme [7, 16] to identify *Nocardia* clinical isolates collected (see S1 Table).

### DNA extraction, PCR amplification and sequencing

DNA extraction of all isolates was performed as previously described [8]. The *Nocardia* 16S rRNA gene was amplified using the primer pair 27F and 1522R [25]. The *Nocardia gyrB*, *secA1*, *hsp65* and *rpoB* genes were amplified as previously described [16]. In all cases, amplified PCR products were sequenced in both directions using the amplification primers on the ABI 3730XL platform (Applied Biosystems, Foster City, CA).

### Species identification by the 5'-end 606 bp partial 16S rRNA gene sequencing and MLSA

Molecular-based species identification was initially carried out by analysis of the 5'-end 606 bp partial 16S rRNA gene sequences as described using a percentage similarity (or identity) score of ≥ 99% as the criterion to strictly classify an isolate to species level [7]. MLSA was then carried

**Table 1. *Nocardia* isolates examined (n = 25) in the present study.**

| Strains no. | Age (years) | Gender | Medical department | Specimen type       | Immuno-Compromised (Yes/No) |
|-------------|-------------|--------|--------------------|---------------------|-----------------------------|
| PUNC001     | 53          | Male   | Outpatient         | PICC Drainage       | No                          |
| PUNC002     | 70          | Female | Gastroenterology   | Sputum              | No                          |
| PUNC003     | 53          | Male   | Immunology         | Lung tissue         | Yes                         |
| PUNC004     | 64          | Male   | Respiratory        | Subcutaneous nodule | Yes                         |
| PUNC005     | 72          | Male   | Nephrology         | Sputum              | Yes                         |
| PUNC006     | 31          | Female | Emergency          | Sputum              | Yes                         |
| PUNC007     | 43          | Female | Thoracic Surgery   | Sputum              | No                          |
| PUNC008     | 50          | Male   | Emergency          | Hydrothorax fluid   | Yes                         |
| PUNC009     | 67          | Male   | Emergency          | Sputum              | No                          |
| PUNC010     | 70          | Male   | Respiratory        | Sputum              | Yes                         |
| PUNC011     | 70          | Male   | Respiratory        | Sputum              | No                          |
| PUNC012     | 51          | Male   | Respiratory        | Sputum              | No                          |
| PUNC013     | 76          | Male   | Respiratory        | Sputum              | No                          |
| PUNC014     | 45          | Female | Respiratory        | Lung tissue         | No                          |
| PUNC015     | 61          | Female | Immunology         | Hydrothorax fluid   | Yes                         |
| PUNC016     | 81          | Male   | Outpatient         | Sputum              | No                          |
| PUNC017     | 71          | Male   | Respiratory        | Sputum              | Yes                         |
| PUNC018     | 56          | Female | Respiratory        | BALF                | Yes                         |
| PUNC019     | 53          | Male   | Orthopedics        | Pus                 | No                          |
| PUNC020     | 46          | Female | Outpatient         | Pus                 | No                          |
| PUNC021     | 57          | Male   | Immunology         | Sputum              | Yes                         |
| PUNC022     | 32          | Female | Respiratory        | BALF                | Yes                         |
| PUNC023     | 45          | Male   | Emergency          | Sputum              | No                          |
| PUNC024     | 37          | Male   | Emergency          | Pus                 | No                          |
| PUNC025     | 65          | Male   | Emergency          | Sputum              | No                          |

Abbreviations: PICC, peripherally inserted central catheter; BALF, bronchoalveolar lavage fluid; SLE, systemic lupus erythematosus; COPD, chronic obstructive pulmonary disease.

doi:10.1371/journal.pone.0147487.t001

out examining nucleotide polymorphisms in the partial 16S rRNA gene at 5'-end (462 bp), as well as the *secA1* (445 bp), *gyrB* (482 bp), *rpoB* (400 bp) and *hsp65* (401 bp) genes [16]. The concatenated *gyrB*-16S-*secA1*-*hsp65*-*rpoB* sequences (2190 bp) were then used for phylogenetic analysis by the maximum-likelihood algorithm based on the Tamura-Nei model [26] with 1000 bootstrap replication to ensure robustness using MEGA software (version 6.0, MEGA Inc., Englewood, NJ). DnaSP software (version 5.1, University of Barcelona, Spain) was used to assess the haplotypes of each gene [27]. Determining of potential subtypes of *N. cyriacigeorgica* isolates was further carried out by analysis of the *Nocardia hsp65* gene as previously described [28, 29].

## Establishment and validation of an “in-house” *Nocardia* mass spectrum database for MALDI-TOF MS

All *Nocardia* isolates were pretreated using a mechanical disruption-ethanol extraction method as described by Dunne *et al.* [30]. MALDI-TOF MS analysis of 25 clinical *Nocardia* strains was first carried out by the Bruker Autoflex Speed TOF/TOF MS system using Biotyper software version 3.1 (db 4613, Bruker Daltonics, Billerica, USA) according to the manufacturer's instructions. A spectral score of < 1.70 was considered not to provide reliable identification. A score of  $\geq 1.70$  but < 2.00 indicated identification at the genus level, and a score of  $\geq 2.00$  was considered identification at the species level [18].

Because the identification results using the manufacturer-provided Biotyper database was unsatisfactory (see “Results” below), five of the 25 clinical isolates representing five different *Nocardia* species (as identified by DNA sequencing in the present study—strain ID no. PUNC001 (*Nocardia farcinica*), PUNC002 (*Nocardia abscessus*), PUNC006 (*Nocardia cyriacigeorgica*), PUNC020 (*Nocardia wallacei*), and PUNC024 (*Nocardia otitidiscaviarum*); Table 2) were used to generate an “in-house” mass spectrum fingerprint database following the methodology of Segawa *et al.* [18]. Each isolate was analyzed in replicates of eight (ie. inoculated in eight spots on the target plate), and each spot was interrogated three times. This procedure was repeated at least once on a different occasion under identical test conditions. The resulting data were averaged using the Biotyper software v3.1 (Bruker Daltonics), a single mass spectrum representing each isolate was generated, and the resultant profiles established as a small “in-house” database.

The 20 remaining clinical isolates were then analyzed against the Biotyper version 3.1 database (Bruker Daltonics) complemented with the “in-house” database. The technicians performing the analysis were blinded to the DNA sequencing results to avoid potential bias.

A main spectrum profile (MSP) dendrogram was further constructed using spectra of 25 *Nocardia* clinical strains in this study along with 37 reference spectra of 32 *Nocardia* species already contained in the Biotyper version 3.1 database for analysis of genetic relatedness.

## Review for publications on validation of MALDI-TOF MS in identification of *Nocardia* species

Key words “*Nocardia*” and “matrix-assisted laser desorption ionization-time of flight mass spectrometry” were used to search related publications in English archived in NCBI PubMed database (<http://www.ncbi.nlm.nih.gov/pubmed>, till Dec 31<sup>st</sup>, 2015). All complete articles of the search (16 publications in all) were screened. After excluding case reports, six publications were reviewed in detail.

## GenBank accession numbers

The DNA sequences of the full-length 16S rRNA, *secA1*, *gyrB*, *rpoB* and *hsp65* genes of 25 *Nocardia* isolates studied have been submitted to GenBank database (accession numbers

**Table 2. Identification results of 25 *Nocardia* clinical isolates by DNA sequencing and MALDI-TOF MS after interrogation against the Biotyper database (version 3.1) and the “in-house” database.**

| Strain ID no.                                                                         | Identification by MLSA     | Identification by conventional methods | Identification by MALDI-TOF MS <sup>a</sup> |       |
|---------------------------------------------------------------------------------------|----------------------------|----------------------------------------|---------------------------------------------|-------|
|                                                                                       |                            |                                        | First reported species                      | Score |
| <b>Isolates used for establishment of “in-house” mass spectra database (no. = 5)</b>  |                            |                                        |                                             |       |
| PUNC001 <sup>a</sup>                                                                  | <i>N. farcinica</i>        | <i>Nocardia</i> sp.                    | N/A                                         | N/A   |
| PUNC002 <sup>a</sup>                                                                  | <i>N. abscessus</i>        | <i>Nocardia</i> sp.                    | N/A                                         | N/A   |
| PUNC006 <sup>a</sup>                                                                  | <i>N. cyriaciageorgica</i> | <i>Nocardia</i> sp.                    | N/A                                         | N/A   |
| PUNC020 <sup>a</sup>                                                                  | <i>N. wallacei</i>         | <i>Nocardia</i> sp.                    | N/A                                         | N/A   |
| PUNC024 <sup>a</sup>                                                                  | <i>N. otitidiscaviarum</i> | <i>N. otitidiscaviarum</i>             | N/A                                         | N/A   |
| <b>Isolates used for validation of the MALDI-TOF MS system<sup>a</sup> (no. = 20)</b> |                            |                                        |                                             |       |
| PUNC003                                                                               | <i>N. cyriaciageorgica</i> | <i>N. cyriaciageorgica</i>             | <i>N. cyriaciageorgica</i>                  | 2.160 |
| PUNC004                                                                               | <i>N. farcinica</i>        | <i>Nocardia</i> sp.                    | <i>N. farcinica</i>                         | 2.332 |
| PUNC005                                                                               | <i>N. cyriaciageorgica</i> | <i>Nocardia</i> sp.                    | <i>N. cyriaciageorgica</i>                  | 2.129 |
| PUNC007                                                                               | <i>N. cyriaciageorgica</i> | <i>N. asteroides</i>                   | <i>N. cyriaciageorgica</i>                  | 2.393 |
| PUNC008                                                                               | <i>N. farcinica</i>        | <i>Nocardia</i> sp.                    | <i>N. farcinica</i>                         | 2.411 |
| PUNC009                                                                               | <i>N. farcinica</i>        | <i>N. farcinica</i>                    | <i>N. farcinica</i>                         | 2.284 |
| PUNC010                                                                               | <i>N. cyriaciageorgica</i> | <i>N. cyriaciageorgica</i>             | <i>N. cyriaciageorgica</i>                  | 2.011 |
| PUNC011                                                                               | <i>N. cyriaciageorgica</i> | <i>N. cyriaciageorgica</i>             | <i>N. cyriaciageorgica</i>                  | 2.232 |
| PUNC012                                                                               | <i>N. farcinica</i>        | <i>Nocardia</i> sp.                    | <i>N. farcinica</i>                         | 2.196 |
| PUNC013                                                                               | <i>N. cyriaciageorgica</i> | <i>N. cyriaciageorgica</i>             | <i>N. cyriaciageorgica</i>                  | 2.126 |
| PUNC014                                                                               | <i>N. farcinica</i>        | <i>N. farcinica</i>                    | <i>N. farcinica</i>                         | 2.124 |
| PUNC015                                                                               | <i>N. farcinica</i>        | <i>N. farcinica</i>                    | <i>N. farcinica</i>                         | 2.055 |
| PUNC016                                                                               | <i>N. cyriaciageorgica</i> | <i>N. cyriaciageorgica</i>             | <i>N. cyriaciageorgica</i>                  | 2.422 |
| PUNC017                                                                               | <i>N. abscessus</i>        | <i>N. abscessus</i>                    | <i>N. abscessus</i>                         | 1.894 |
| PUNC018                                                                               | <i>N. cyriaciageorgica</i> | <i>Nocardia</i> sp.                    | <i>N. cyriaciageorgica</i>                  | 2.307 |
| PUNC019                                                                               | <i>N. cyriaciageorgica</i> | <i>N. cyriaciageorgica</i>             | <i>N. cyriaciageorgica</i>                  | 2.145 |
| PUNC021                                                                               | <i>N. cyriaciageorgica</i> | <i>Nocardia</i> sp.                    | <i>N. cyriaciageorgica</i>                  | 2.079 |
| PUNC022                                                                               | <i>N. farcinica</i>        | <i>Nocardia</i> sp.                    | <i>N. farcinica</i>                         | 2.498 |
| PUNC023                                                                               | <i>N. farcinica</i>        | <i>N. farcinica</i>                    | <i>N. farcinica</i>                         | 2.431 |
| PUNC025                                                                               | <i>N. cyriaciageorgica</i> | <i>Nocardia</i> sp.                    | <i>N. cyriaciageorgica</i>                  | 2.052 |

Abbreviation: N/A, not applicable.

<sup>a</sup> Results by using the Bruker Biotyper version 3.1 (Bruker Daltonics) complementation with the “in-house” database (see [Materials and Methods](#) for detail).

doi:10.1371/journal.pone.0147487.t002

KT985911 to KT985935, KU052160 to KU052184, KU052085 to KU052109, KU052135 to KU052159 and KU052110 to KU052134 for the above five genes, respectively, [S2 Table](#)).

## Results

### Identification by the 5'-end 606 bp partial 16S rRNA gene sequencing

Of 25 *Nocardia* clinical strains, 24 isolates representing four *Nocardia* species were identified unambiguously by the 5'-end 606 bp partial 16S rRNA gene sequencing. *N. cyriaciageorgica* (n = 12, 48%) and *N. farcinica* (n = 9, 36%) were the most common species, followed by *N. abscessus* (n = 2, 8%) and *N. otitidiscaviarum* (n = 1, 4%). However, the 5'-end 606 bp partial 16S rRNA gene sequence of strain PUNC020 showed 99% sequence similarity to both *N. wallacei* type strain DSM 45136<sup>T</sup> (606/606, 100%) and *Nocardia transvalensis* type strain NRRL B-16037<sup>T</sup> (600/606, 99.0%), though was identical to the former.

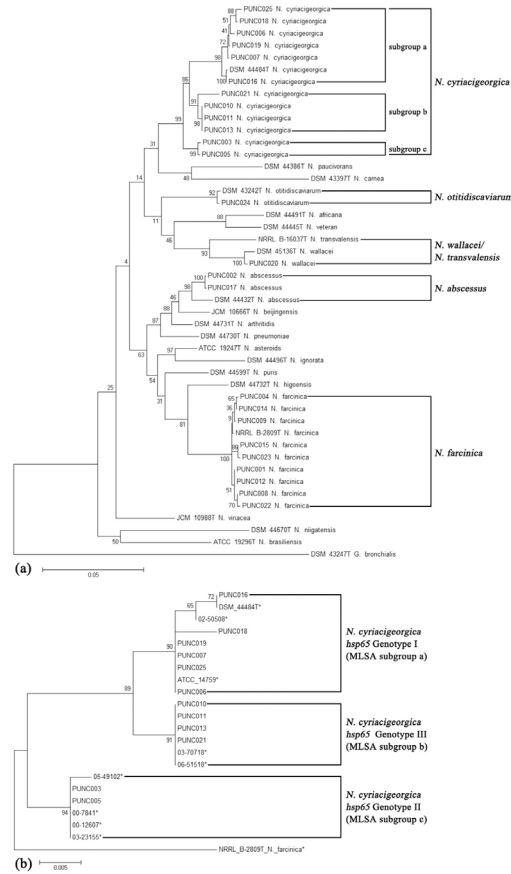

**Fig 1. Phylogenetic trees are shown and were conducted using the maximum-likelihood method. Fig 1a.** Phylogenetic tree based on the concatenated *gyrB*-16S-*secA1*-*hsp65*-*rpoB* sequences of 25 *Nocardia* clinical isolates and 20 *Nocardia* type strains, using *Gordonia bronchialis* strain ATCC 25592<sup>T</sup> as an outgroup (S1 Table). **Fig 1b.** Phylogenetic tree based on the *hsp65* gene sequences of 12 *N. cyriaciageorgica* clinical isolates and nine *Nocardia cyriaciageorgica* isolates whose genotypes have previously been determined by Schlaberg *et al.* [29] using the sequence of a *Nocardia farcinica* strain as an outgroup.

doi:10.1371/journal.pone.0147487.g001

### MLSA

Phylogenetic analysis of concatenated *gyrB*-16S-*secA1*-*hsp65*-*rpoB* sequences obtained from the 25 clinical isolates and 20 *Nocardia* type strain sequences clearly revealed five major clusters with bootstrap threshold values of  $\geq 90\%$  (Fig 1). Each cluster corresponded to a unique *Nocardia* species, ie. *N. cyriaciageorgica*, *N. otitidiscaviarum*, *N. farcinica*, and *N. abscessus*, except for clinical strain PUNC020 that was clustered together with type strains of *N. wallacei* and *N. transvalensis*. As strain PUNC020 was more phylogenetically closely related to *N. wallacei* strain DSM 45136<sup>T</sup> compared with *N. transvalensis* strain NRRL B-16037<sup>T</sup> (Fig 1), the isolate was assigned as *N. wallacei*.

Twelve *N. cyriaciageorgica* clinical isolates could further be classified into three subgroups: subgroup a (n = 6), b (n = 4) and c (n = 2), (Fig 1A). Comparing with results obtained by *N. cyriaciageorgica* genotyping using sequence analysis of the *hsp65* gene [28, 29], isolates belonging to *N. cyriaciageorgica* MLSA subgroups a, b and c corresponded to *N. cyriaciageorgica hsp65* genotype I, III and II, respectively (Fig 1B).

Overall, it was observed that the *rpoB*, *gyrB* and *secA1* genes were the most polymorphic (14 to 16 haplotypes identified amongst 25 clinical strains, haplotype diversity  $\geq 0.950$ ), followed

by *hsp65* (10 haplotypes, haplotype diversity = 0.837), whilst the partial 16S rRNA gene was the least polymorphic (five haplotypes, haplotype diversity = 0.657) (Table 3 and S2 Table). Different degrees of intra-species micro-heterogeneity of different genes were also observed (Table 3). *N. cyriacigeorgica* isolates generally exhibited higher intra-species diversity than other species e.g. *N. farcinica* (Table 3).

### Improvement of MALDI-TOF MS identification capacity by the “in-house” database

Of the five species identified by the 5'-end 606 bp partial 16S rRNA gene sequencing and MLSA from the present study which we selected to establish a mini “in-house” database, representation of four species (*N. cyriacigeorgica*, *N. farcinica*, *N. abscessus* and *N. otitidisaviarum*) was already included in the Biotyper version 3.1 database (Bruker Daltonics); however, *N. wal-lacei* was not represented. When all 25 clinical isolates were interrogated using only the Biotyper database, only eight of 25 (32%) isolates was identified to genus level, none (0%) to species level, and 17 isolates were not identified (68%).

Using the “in-house” database to complement the Biotyper database, 19 of 20 (95%) *Nocardia* clinical isolates were correctly identified to species level with scores of  $\geq 2.0$  (Table 2). *N. abscessus* strain PUNC017, which yielded a MALDI-TOF MS score of 1.894, was identified to genus level (Table 2).

The MSP dendrogram indicated that the spectral profile of clinical isolates were distinct from the corresponding reference spectra for its species in the Biotyper database (Fig 2). The mass spectra differences between *N. abscessus* strain PUNC002 (for establishment of the “in-house” database) and *N. abscessus* strain PUNC017 (for test of the “in-house” database) also resulted in failure in identifying strain PUNC017 to specie level using the “in-house” database (Fig 2). Therefore, the mass spectra of strain PUNC017 was incorporated into the “in-house” database for future study. Similar divergence of mass spectra were also noted in *N. otitidisaviarum* for clinical strain PUNC024 versus strain VA\_01844\_09 and type strain DSM 43242<sup>T</sup> that included in the commercial database (Fig 2), which led to failure of identifying strain PUNC024 to species level using the commercial database.

### Literature review for *Nocardia* identification by MALDI-TOF MS

Of six studies reviewed, five had evaluated the Bruker Biotyper commercial database (version 3.1 or 3.0.2) and one, an Andromas (Paris, France) system (Table 4). The Biotyper database

**Table 3. Genetic polymorphisms contained within the 16S rRNA, *gyrB*, *secA1*, *hsp65* and *rpoB* genes for 25 clinical *Nocardia* isolates studied.**

| Characters                                | <i>gyrB</i> | 16S rRNA gene | <i>secA1</i> | <i>hsp65</i> | <i>rpoB</i> |
|-------------------------------------------|-------------|---------------|--------------|--------------|-------------|
| <b>All clinical isolates (n = 25)</b>     |             |               |              |              |             |
| No. of haplotypes                         | 16          | 5             | 14           | 10           | 16          |
| Haplotype diversity                       | 0.957       | 0.657         | 0.950        | 0.837        | 0.963       |
| <b><i>N. cyriacigeorgica</i> (n = 12)</b> |             |               |              |              |             |
| No. of haplotypes                         | 8           | 1             | 6            | 5            | 8           |
| Haplotype diversity                       | 0.924       | N/A           | 0.848        | 0.803        | 0.924       |
| <b><i>N. farcinica</i> (n = 9)</b>        |             |               |              |              |             |
| No. of haplotypes                         | 4           | 1             | 5            | 1            | 5           |
| Haplotype diversity                       | 0.778       | N/A           | 0.889        | N/A          | 0.861       |

Abbreviation: N/A, not applicable.

doi:10.1371/journal.pone.0147487.t003

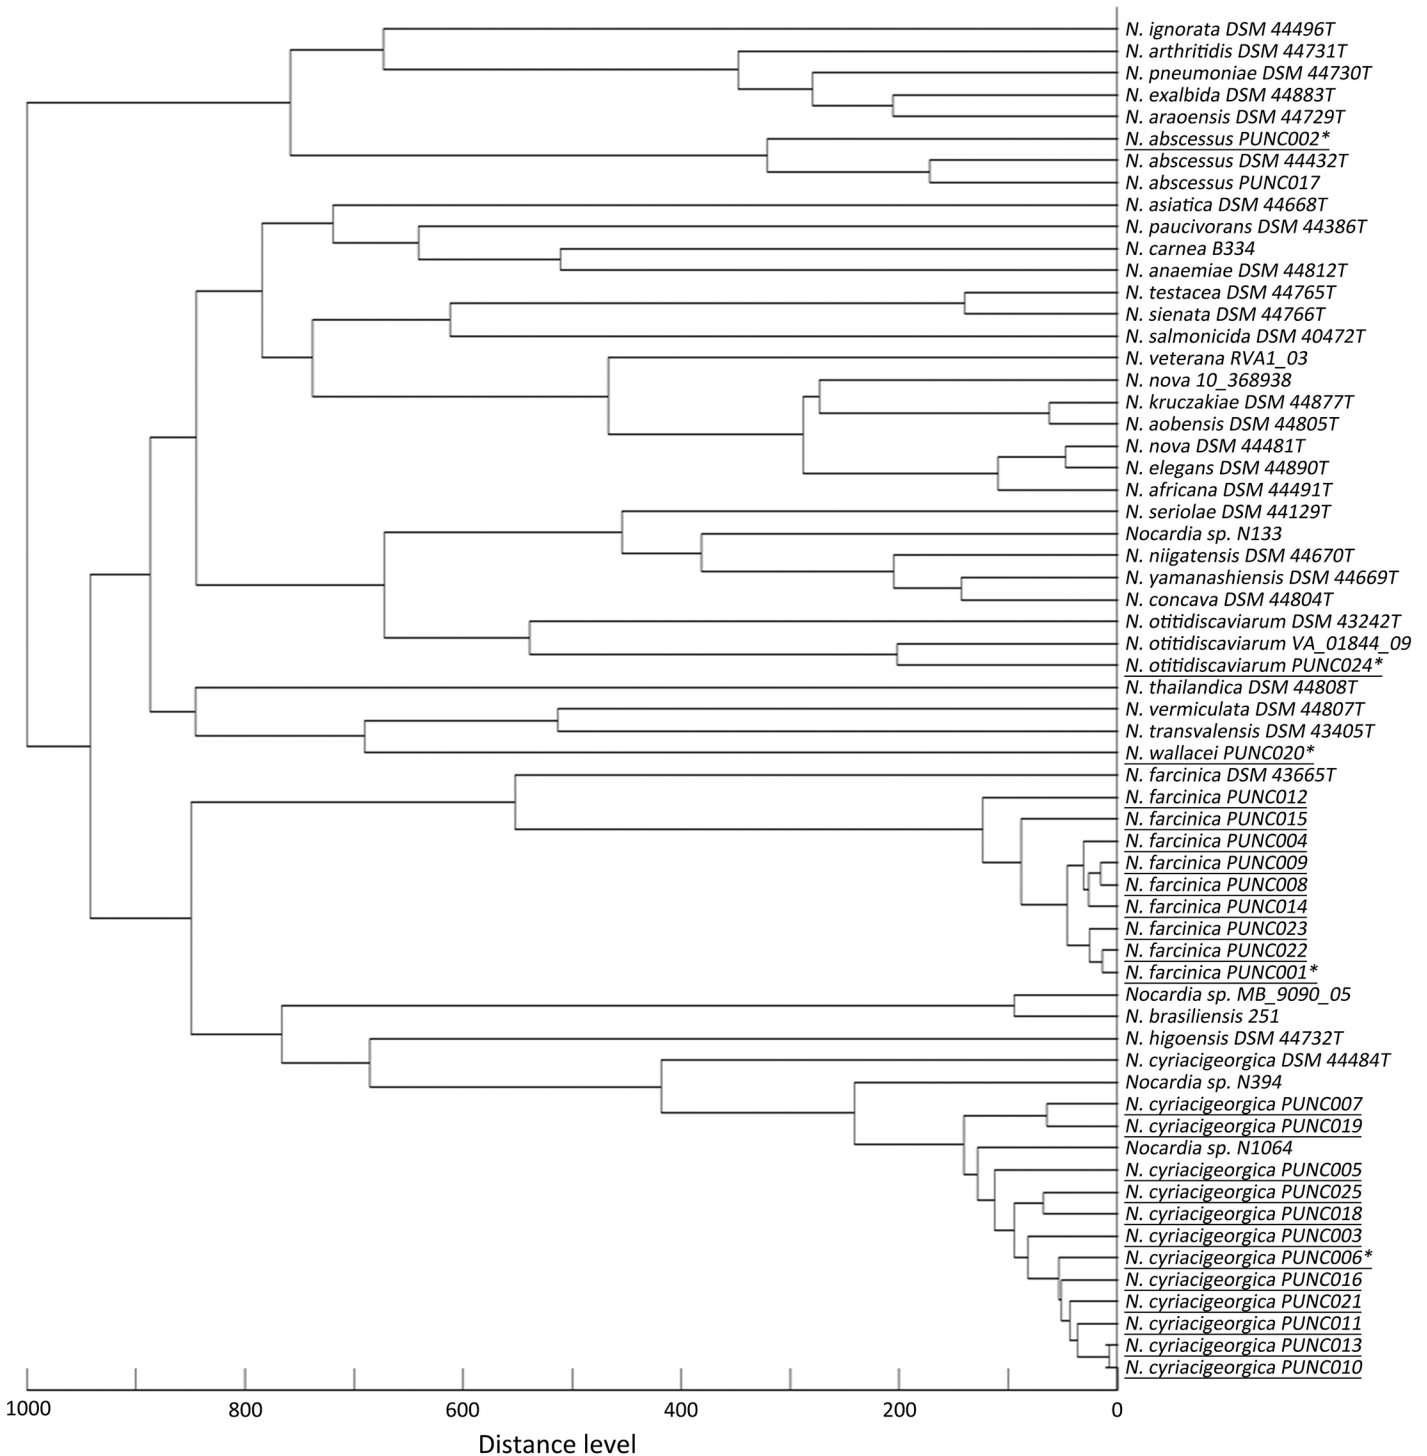

**Fig 2. The main spectrum profile (MSP) dendrogram constructed using spectra of 25 *Nocardia* clinical strains along with 37 reference spectra of 32 *Nocardia* species contained in the original Biotyper database (version 3.1; Bruker). Strain identification numbers of clinical isolates collected in the present study are shown underlined, and isolates used for establishment of the “in-house” database was labeled with asterisks.**

doi:10.1371/journal.pone.0147487.g002

only correctly identified 14.9–52.8% of isolates to species level and an additional 6.9–52.7% of isolates to genus level. The performance of Andromas system (Paris, France) was better (80.4%



**Table 4. Review of publications for evaluation of MALDI-TOF MS for the identification of *Nocardia* species.**

| System                       | Reference method                              | ID criteria to species/genus | Ni/Ns for DB validation | Commercial DB         |                             | "In-house" DB            |                             | Reference  |
|------------------------------|-----------------------------------------------|------------------------------|-------------------------|-----------------------|-----------------------------|--------------------------|-----------------------------|------------|
|                              |                                               |                              |                         | DB version            | Correct ID to species/genus | Ni/Ns for DB development | Correct ID to species/genus |            |
| Bruker Autoflex Speed        | MLSA                                          | ≥ 2.0/< 2.0 and ≥ 1.7        | See note <sup>a</sup>   | BioTyper ver. 3.1     | 0%/32.0% <sup>a</sup>       | 5/5                      | 95.0%/5.0% <sup>a</sup>     | This study |
| Bruker microflex LT          | 16S rRNA gene and conventional                | ≥ 2.0/< 2.0 and ≥ 1.7        | 148/15                  | BioTyper ver. 3.1     | 41.9%/15.5%                 | 232/53                   | 89.9%/4.7%                  | [23]       |
| Bruker (Model not specified) | 16S rRNA, <i>hsp65</i> and <i>secA1</i> genes | ≥ 1.9/< 1.9 and ≥ 1.7        | 87/25                   | BioTyper ver. 3.1     | 52.8%/6.9%                  | 13/13                    | 82.8%/11.5%                 | [22]       |
| Bruker microflex LT          | 16S rRNA gene and conventional                | ≥ 2.0/< 2.0 and ≥ 1.7        | 64/22                   | BioTyper ver. 3.1     | 15.6%/25.0%                 | 192/73                   | 90.6%/9.4%                  | [18]       |
| Bruker microflex LT          | 16S rRNA and <i>secA1</i> genes               | ≥ 2.0/< 2.0 and ≥ 1.7        | 74/14                   | BioTyper ver. 3.1     | 14.9%/52.7%                 | ND                       | ND                          | [19]       |
| Andromas                     | 16S rRNA, <i>hsp65</i> genes, conventional    | See note <sup>b</sup>        | 51/12                   | See note <sup>b</sup> | 80.4%/17.6%                 | ND                       | ND                          | [21]       |
| Bruker microflex LT          | 16S rRNA gene and conventional                | ≥ 2.0/< 2.0 and ≥ 1.7        | 43/9                    | BioTyper ver. 3.0.2   | 23.3%/20.9%                 | 110/17                   | 79.1%/9.3%                  | [20]       |

Abbreviations: ID, identification; Ni/Ns, number of isolates/number of species; DB, database; MLSA, multilocus sequence analysis.

<sup>a</sup> In the present study, all 25 *Nocardia* clinical isolates collected were involved for validation of the commercial Bruker Biotyper database. While for the "in-house" database, five of the 25 *Nocardia* isolates were used for databased development, and the rest 20 isolates were used for "in-house" database validation. See details in [Methods](#) section.

<sup>b</sup> An Andromas database (database version not specified) was employed in the study by Farfour *et al.* Criteria for correct identification to species level: percentage of common peaks is ≥ 68% and more than 10% difference between the first two best-match species. Criteria for correct identification to genus level: percentage of common peaks is ≥ 68% yet less than 10% difference between the first two best-match species.

doi:10.1371/journal.pone.0147487.t004

to species level and 17.6% to genus level). Three studies further developed local "in-house" databases, and the correct identification rate was significantly improved to 79.1–90.6% to species level and an additional 4.7–11.5% to genus level ([Table 4](#)).

### A proposed algorithm for species identification of *Nocardia* in clinical laboratories

Although the MLSA scheme was definitively able to assign species, identify novel species, and to differentiate within species, it has the disadvantage of relatively high costs, and requiring staff time for analysis of results. We propose an algorithm for species identification of *Nocardia* in the clinical laboratory ([Fig 3](#)), recommending that identification by MALDI-TOF MS using a database complemented by "in-house" protein profiles be attempted in the initial instance. For those isolates that cannot be identified to species level by MALDI-TOF MS, the 5'-end 606 bp partial 16S rRNA sequencing may be attempted. For any isolates with < 99% gene sequence similarity to a known archived strain sequence or those with two or more "best hit" species identities, MLSA could be undertaken for a definitive identification.

### Discussion

To date, more than 50 species of pathogenic *Nocardia* have been identified [31]. Since there are differences in prevalence of species between geographic regions, knowledge of species distribution is important. In the present study, *N. cyriacigeorgica* and *N. farcinica* were the most

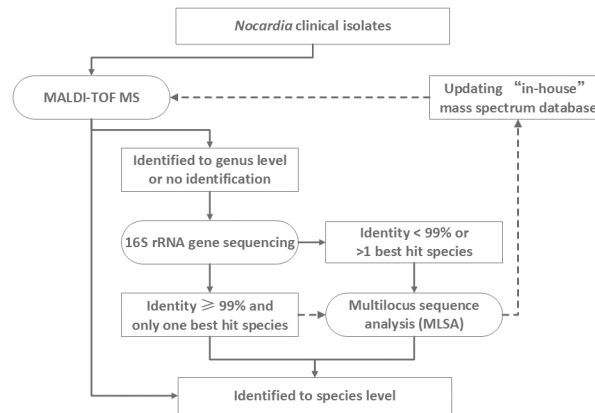

**Fig 3. Proposed algorithm for laboratory identification of *Nocardia* isolates (solid lines) and establishment and expansion of ongoing “in-house” mass spectrum database (dashed lines).**

doi:10.1371/journal.pone.0147487.g003

commonly encountered species, similar to that in Canada [16], but in contrast to a report from Taiwan where *Nocardia brasiliensis* was the most common [32]. In comparison, *Nocardia asteroides* was reported to be predominant in Switzerland [31], while *N. nova* was predominant in Australia [7].

Most studies examining identification of *Nocardia* have indicated that molecular techniques are required to achieve species assignment [6, 16, 31, 32]. Although polymorphisms in the 5'-end partial 16S rRNA gene is widely used to discriminate between *Nocardia* species, misidentification may occur due to high sequence similarity between certain species [6, 7, 16, 33], as exemplified by inability to distinguish *N. wallacei* from *N. transvalensis* in the present study, or due to multiple different copies of this gene, such as that in *N. nova* [9]. *N. wallacei* is very closely related to *N. transvalensis* and indeed was previously classified within the *N. transvalensis* complex. Using a more discriminatory method, in this case, a 5-locus MLSA, *N. wallacei* was assigned as an individual species, which supported findings by Conville *et al.* [12].

In this context then, MLSA has been carried out as an alternative technique for the identification of *Nocardia*. The most commonly used genes have been the 16S rRNA, *secA1*, *gyrB*, *rpoB* and *hsp65* genes. Different studies may employ different combination of the genes [11, 16, 34], yet it is notable that no single gene locus sequencing is sufficient to resolve a substantial number of *Nocardia* species [16]. In addition, the MLSA scheme can be used for examining intra-species genetic diversity [10, 11, 13]. Using this approach, Carrasco *et al.* has reported that species *N. nova* had highest intra-species heterogeneity, followed by *N. cyriaciageorgica* and *N. abscessus*, while *N. farcinica* was more conserved [11]. Although the diversity of *N. abscessus* and *N. nova* were not compared in this study due to only a limited number of isolates studied, we similarly found genetic heterogeneity within *N. cyriaciageorgica* where three subgroups were identified. Of note, these subgroups correspond to three *hsp65* genotypes proposed in previous studies [28, 29]. In the diagnostic algorithm proposed (Fig 3) for laboratory identification of *Nocardia*, MLSA has good clinical utility in definitive confirmative of species.

Application of sequencing-based methods in the routine work of clinical laboratories is restricted by high costs and the need for on-site sequencing facilities which potentially affect turn-around times. The recent introduction of MALDI-TOF MS platforms in clinical laboratories has revolutionized diagnostic microbiology [35]. However, its application in identification of *Nocardia* species required extra protein-extraction pretreatment of isolates [17, 30], and more importantly, may be limited by insufficient archiving of reference spectra within commercial MALDI-TOF MS databases [17–20]. In this study, the MSP analysis indicated

significant differences between spectra of the clinical isolates studied and reference spectra of corresponding species contained in the Biotyper version 3.1 database (Bruker Daltonics), which yielded suboptimal results in species identification when used as the only database. However, the establishment of even a small “in-house” database significantly improved the identification capacity of the MALDI-TOF MS system, as also found previously [18, 20, 22, 23]. To improve the identification capacity of MALDI-TOF MS, it is important for MS databases to contain more reference mass spectra from type strains of different bacteria species, and also spectra representing different strains of the same species [35], as strains of the same species may have divergent mass spectra e.g. the case of *N. abscessus* clinical strain PUNC002 and PUNC017 found in the present study. With an ongoing expanded “in-house” database representing species that are the more frequently encountered, the utility and practicality of MALDI-TOF MS for *Nocardia* identification will be improved. However, before expanding any “in-house” mass spectrum database, we recommend that *Nocardia* isolates be analyzed by MLSA to ensure the high-quality of the “in-house” database (Fig 3). Moreover, comparing to MLSA, the MALDI-TOF MS system was unable to cluster *N. cyriacigeorgica* into subgroups. In this regard, MLSA is superior to MALDI-TOF MS for subgrouping *N. cyriacigeorgica*. Further studies addressing differences in MS profiles between *N. cyriacigeorgica* strains are warranted.

The major limitation of the current study is that relatively few isolates representing a small number of species was examined, and all isolates were from a single center and hence may not be generalizable across centers in China. Continuous expansion of the MALDI-TOF MS databases to include more species is necessary.

## Conclusions

In conclusion, we have evaluated MLSA scheme and MALDI-TOF MS for identification of *Nocardia* clinical isolates. MLSA showed superior discriminatory power compared with the 5'-end 606bp partial 16S rRNA gene sequencing for species identification of *Nocardia*. MALDI-TOF MS has good utility in rapidly and accurately providing species identification but is contingent on building up a robust library of reference spectra.

## Supporting Information

**S1 Table. Species of *Nocardia* and GenBank accession numbers of five gene sequences for six type strains of *Nocardia* studied.**

(DOCX)

**S2 Table. Haplotype nomenclature based on sequencing of five *Nocardia* genes for 25 clinical *Nocardia* isolates.**

(DOCX)

## Author Contributions

Conceived and designed the experiments: MX LP YPZ YCX. Performed the experiments: MX LP XH JWC. Analyzed the data: MX LP XF. Contributed reagents/materials/analysis tools: LZ HXL. Wrote the paper: MX LP SC FK YCX.

## References

1. Minero MV, Marin M, Cercenado E, Rabadan PM, Bouza E, Munoz P. Nocardiosis at the turn of the century. *Medicine (Baltimore)*. 2009; 88(4):250–61. doi: [10.1097/MD.0b013e3181afa1c8](https://doi.org/10.1097/MD.0b013e3181afa1c8) PMID: [19593231](https://pubmed.ncbi.nlm.nih.gov/19593231/).

2. Clark NM, Practice ASTIDCo. *Nocardia* in solid organ transplant recipients. *Am J Transplant*. 2009; 9 Suppl 4:S70–7.
3. Wang HL, Seo YH, LaSala PR, Tarrand JJ, Han XY. Nocardiosis in 132 patients with cancer: microbiological and clinical analyses. *Am J Clin Pathol*. 2014; 142(4):513–23. doi: [10.1309/AJCPW84AFTUWMHYU](https://doi.org/10.1309/AJCPW84AFTUWMHYU) PMID: [25239419](https://pubmed.ncbi.nlm.nih.gov/25239419/).
4. Zhou L, Liu H, Yuan F, Yuan S. Disseminated nocardiosis in a patient with nephrotic syndrome following HIV infection. *Exp Ther Med*. 2014; 8(4):1142–4. doi: [10.3892/etm.2014.1883](https://doi.org/10.3892/etm.2014.1883) PMID: [25187812](https://pubmed.ncbi.nlm.nih.gov/25187812/); PubMed Central PMCID: PMC4151671.
5. Roth A, Andrees S, Kroppenstedt RM, Harmsen D, Mauch H. Phylogeny of the genus *Nocardia* based on reassessed 16S rRNA gene sequences reveals underspeciation and division of strains classified as *Nocardia asteroides* into three established species and two unnamed taxons. *J Clin Microbiol*. 2003; 41(2):851–6. PMID: [12574299](https://pubmed.ncbi.nlm.nih.gov/12574299/); PubMed Central PMCID: PMC149683.
6. Brown-Elliott BA, Brown JM, Conville PS, Wallace RJ Jr. Clinical and laboratory features of the *Nocardia* spp. based on current molecular taxonomy. *Clin Microbiol Rev*. 2006; 19(2):259–82. doi: [10.1128/CMR.19.2.259-282.2006](https://doi.org/10.1128/CMR.19.2.259-282.2006). PMID: [16614249](https://pubmed.ncbi.nlm.nih.gov/16614249/); PubMed Central PMCID: PMC1471991.
7. Kong F, Chen SC, Chen X, Sintchenko V, Halliday C, Cai L, et al. Assignment of reference 5'-end 16S rDNA sequences and species-specific sequence polymorphisms improves species identification of *Nocardia*. *Open Microbiol J*. 2009; 3:97–105. doi: [10.2174/1874285800903010097](https://doi.org/10.2174/1874285800903010097) PMID: [19639036](https://pubmed.ncbi.nlm.nih.gov/19639036/); PubMed Central PMCID: PMC2714554.
8. Xiao M, Kong F, Sorrell TC, Cao Y, Lee OC, Liu Y, et al. Identification of pathogenic *Nocardia* species by reverse line blot hybridization targeting the 16S rRNA and 16S-23S rRNA gene spacer regions. *J Clin Microbiol*. 2010; 48(2):503–11. doi: [10.1128/JCM.01761-09](https://doi.org/10.1128/JCM.01761-09) PMID: [19955277](https://pubmed.ncbi.nlm.nih.gov/19955277/); PubMed Central PMCID: PMC2815619.
9. Conville PS, Witebsky FG. Multiple copies of the 16S rRNA gene in *Nocardia nova* isolates and implications for sequence-based identification procedures. *J Clin Microbiol*. 2005; 43(6):2881–5. doi: [10.1128/JCM.43.6.2881-2885.2005](https://doi.org/10.1128/JCM.43.6.2881-2885.2005) PMID: [15956412](https://pubmed.ncbi.nlm.nih.gov/15956412/); PubMed Central PMCID: PMC1151890.
10. Carrasco G, Valdezate S, Garrido N, Medina-Pascual MJ, Villalon P, Saez-Nieto JA. *gyrB* analysis as a tool for identifying *Nocardia* species and exploring their phylogeny. *J Clin Microbiol*. 2015; 53(3):997–1001. doi: [10.1128/JCM.03072-14](https://doi.org/10.1128/JCM.03072-14) PMID: [25540402](https://pubmed.ncbi.nlm.nih.gov/25540402/); PubMed Central PMCID: PMC4390627.
11. Carrasco G, Valdezate S, Garrido N, Villalon P, Medina-Pascual MJ, Saez-Nieto JA. Identification, typing, and phylogenetic relationships of the main clinical *Nocardia* species in Spain according to their *gyrB* and *rpoB* genes. *J Clin Microbiol*. 2013; 51(11):3602–8. doi: [10.1128/JCM.00515-13](https://doi.org/10.1128/JCM.00515-13) PMID: [23966490](https://pubmed.ncbi.nlm.nih.gov/23966490/); PubMed Central PMCID: PMC3889740.
12. Conville PS, Zelazny AM, Witebsky FG. Analysis of *secA1* gene sequences for identification of *Nocardia* species. *J Clin Microbiol*. 2006; 44(8):2760–6. doi: [10.1128/JCM.00155-06](https://doi.org/10.1128/JCM.00155-06) PMID: [16891489](https://pubmed.ncbi.nlm.nih.gov/16891489/); PubMed Central PMCID: PMC1594632.
13. Kong F, Wang H, Zhang E, Sintchenko V, Xiao M, Sorrell TC, et al. *secA1* gene sequence polymorphisms for species identification of *Nocardia* species and recognition of intraspecies genetic diversity. *J Clin Microbiol*. 2010; 48(11):3928–34. doi: [10.1128/JCM.01113-10](https://doi.org/10.1128/JCM.01113-10) PMID: [20810768](https://pubmed.ncbi.nlm.nih.gov/20810768/); PubMed Central PMCID: PMC3020853.
14. Rodriguez-Nava V, Couble A, Devulder G, Flandrois JP, Boiron P, Laurent F. Use of PCR-restriction enzyme pattern analysis and sequencing database for *hsp65* gene-based identification of *Nocardia* species. *J Clin Microbiol*. 2006; 44(2):536–46. doi: [10.1128/JCM.44.2.536-546.2006](https://doi.org/10.1128/JCM.44.2.536-546.2006) PMID: [16455910](https://pubmed.ncbi.nlm.nih.gov/16455910/); PubMed Central PMCID: PMC1392680.
15. Yin X, Liang S, Sun X, Luo S, Wang Z, Li R. Ocular nocardiosis: HSP65 gene sequencing for species identification of *Nocardia* spp. *Am J Ophthalmol*. 2007; 144(4):570–3. doi: [10.1016/j.ajo.2007.06.031](https://doi.org/10.1016/j.ajo.2007.06.031) PMID: [17698022](https://pubmed.ncbi.nlm.nih.gov/17698022/).
16. McTaggart LR, Richardson SE, Witkowska M, Zhang SX. Phylogeny and identification of *Nocardia* species on the basis of multilocus sequence analysis. *J Clin Microbiol*. 2010; 48(12):4525–33. doi: [10.1128/JCM.00883-10](https://doi.org/10.1128/JCM.00883-10) PMID: [20844218](https://pubmed.ncbi.nlm.nih.gov/20844218/); PubMed Central PMCID: PMC3008441.
17. Toyokawa M, Kimura K, Nishi I, Sunada A, Ueda A, Sakata T, et al. Reliable and reproducible method for rapid identification of *Nocardia* species by matrix-assisted laser desorption/ionization time-of-flight mass spectrometry. *Rinsho Biseibutshu Jinsoku Shindan Kenkyukai Shi*. 2013; 24(1):1–8. PMID: [24800394](https://pubmed.ncbi.nlm.nih.gov/24800394/).
18. Segawa S, Nishimura M, Sogawa K, Tsuchida S, Murata S, Watanabe M, et al. Identification of *Nocardia* species using matrix-assisted laser desorption/ionization-time-of-flight mass spectrometry. *Clin Proteomics*. 2015; 12(1):6. doi: [10.1186/s12014-015-9078-5](https://doi.org/10.1186/s12014-015-9078-5) PMID: [25931991](https://pubmed.ncbi.nlm.nih.gov/25931991/); PubMed Central PMCID: PMC4409724.
19. Hsueh PR, Lee TF, Du SH, Teng SH, Liao CH, Sheng WH, et al. Bruker biotyper matrix-assisted laser desorption ionization-time of flight mass spectrometry system for identification of *Nocardia*,

- Rhodococcus*, *Kocuria*, *Gordonia*, *Tsukamurella*, and *Listeria* species. J Clin Microbiol. 2014; 52(7):2371–9. doi: [10.1128/JCM.00456-14](https://doi.org/10.1128/JCM.00456-14) PMID: [24759706](https://pubmed.ncbi.nlm.nih.gov/24759706/); PubMed Central PMCID: PMC4097692.
20. Verroken A, Janssens M, Berhin C, Bogaerts P, Huang TD, Wauters G, et al. Evaluation of matrix-assisted laser desorption ionization-time of flight mass spectrometry for identification of *Nocardia* species. J Clin Microbiol. 2010; 48(11):4015–21. doi: [10.1128/JCM.01234-10](https://doi.org/10.1128/JCM.01234-10) PMID: [20861335](https://pubmed.ncbi.nlm.nih.gov/20861335/); PubMed Central PMCID: PMC3020850.
  21. Farfour E, Leto J, Barritault M, Barberis C, Meyer J, Dauphin B, et al. Evaluation of the Andromas matrix-assisted laser desorption ionization-time of flight mass spectrometry system for identification of aerobically growing Gram-positive bacilli. J Clin Microbiol. 2012; 50(8):2702–7. doi: [10.1128/JCM.00368-12](https://doi.org/10.1128/JCM.00368-12) PMID: [22692743](https://pubmed.ncbi.nlm.nih.gov/22692743/); PubMed Central PMCID: PMC3421524.
  22. Khot PD, Bird BA, Durrant RJ, Fisher MA. Identification of *Nocardia* Species by Matrix-Assisted Laser Desorption Ionization-Time of Flight Mass Spectrometry. J Clin Microbiol. 2015; 53(10):3366–9. doi: [10.1128/JCM.00780-15](https://doi.org/10.1128/JCM.00780-15) PMID: [26269617](https://pubmed.ncbi.nlm.nih.gov/26269617/); PubMed Central PMCID: PMC4572548.
  23. Buckwalter SP, Olson SL, Connelly BJ, Lucas BC, Rodning AA, Walchak RC, et al. Evaluation of MALDI-TOF Mass Spectrometry for the Identification of *Mycobacterium* species, *Nocardia* species and Other Aerobic Actinomycetes. J Clin Microbiol. 2015. doi: [10.1128/JCM.02128-15](https://doi.org/10.1128/JCM.02128-15) PMID: [26637381](https://pubmed.ncbi.nlm.nih.gov/26637381/).
  24. Versalovic J, American Society for Microbiology. Manual of clinical microbiology. 10th ed. Washington, DC: ASM Press; 2011.
  25. Suzuki MT, Giovannoni SJ. Bias caused by template annealing in the amplification of mixtures of 16S rRNA genes by PCR. Appl Environ Microbiol. 1996; 62(2):625–30. PMID: [8593063](https://pubmed.ncbi.nlm.nih.gov/8593063/); PubMed Central PMCID: PMC167828.
  26. Tamura K, Nei M. Estimation of the number of nucleotide substitutions in the control region of mitochondrial DNA in humans and chimpanzees. Mol Biol Evol. 1993; 10(3):512–26. PMID: [8336541](https://pubmed.ncbi.nlm.nih.gov/8336541/).
  27. Librado P, Rozas J. DnaSP v5: a software for comprehensive analysis of DNA polymorphism data. Bioinformatics. 2009; 25(11):1451–2. doi: [10.1093/bioinformatics/btp187](https://doi.org/10.1093/bioinformatics/btp187) PMID: [19346325](https://pubmed.ncbi.nlm.nih.gov/19346325/).
  28. Rudramurthy SM, Honnavar P, Kaur H, Samanta P, Ray P, Ghosh A, et al. Molecular identification of clinical *Nocardia* isolates from India. J Med Microbiol. 2015; 64(10):1216–25. doi: [10.1099/jmm.0.000143](https://doi.org/10.1099/jmm.0.000143) PMID: [26202321](https://pubmed.ncbi.nlm.nih.gov/26202321/).
  29. Schlaberg R, Huard RC, Della-Latta P. *Nocardia cyriacigeorgica*, an emerging pathogen in the United States. J Clin Microbiol. 2008; 46(1):265–73. doi: [10.1128/JCM.00937-07](https://doi.org/10.1128/JCM.00937-07) PMID: [18003809](https://pubmed.ncbi.nlm.nih.gov/18003809/); PubMed Central PMCID: PMC2224293.
  30. Dunne WM Jr, Doing K, Miller E, Miller E, Moreno E, Baghli M, et al. Rapid inactivation of *Mycobacterium* and *Nocardia* species before identification using matrix-assisted laser desorption ionization-time of flight mass spectrometry. J Clin Microbiol. 2014; 52(10):3654–9. doi: [10.1128/JCM.01728-14](https://doi.org/10.1128/JCM.01728-14) PMID: [25078917](https://pubmed.ncbi.nlm.nih.gov/25078917/); PubMed Central PMCID: PMC4187772.
  31. Ambrosioni J, Lew D, Garbino J. Nocardiosis: updated clinical review and experience at a tertiary center. Infection. 2010; 38(2):89–97. doi: [10.1007/s15010-009-9193-9](https://doi.org/10.1007/s15010-009-9193-9) PMID: [20306281](https://pubmed.ncbi.nlm.nih.gov/20306281/).
  32. Liu WL, Lai CC, Ko WC, Chen YH, Tang HJ, Huang YL, et al. Clinical and microbiological characteristics of infections caused by various *Nocardia* species in Taiwan: a multicenter study from 1998 to 2010. Eur J Clin Microbiol Infect Dis. 2011; 30(11):1341–7. doi: [10.1007/s10096-011-1227-9](https://doi.org/10.1007/s10096-011-1227-9) PMID: [21461846](https://pubmed.ncbi.nlm.nih.gov/21461846/).
  33. Tamura T, Matsuzawa T, Oji S, Ichikawa N, Hosoyama A, Katsumata H, et al. A genome sequence-based approach to taxonomy of the genus *Nocardia*. Antonie Van Leeuwenhoek. 2012; 102(3):481–91. doi: [10.1007/s10482-012-9780-5](https://doi.org/10.1007/s10482-012-9780-5) PMID: [22836677](https://pubmed.ncbi.nlm.nih.gov/22836677/).
  34. Baio PV, Ramos JN, dos Santos LS, Soriano MF, Ladeira EM, Souza MC, et al. Molecular identification of *Nocardia* isolates from clinical samples and an overview of human nocardiosis in Brazil. PLoS Negl Trop Dis. 2013; 7(12):e2573. doi: [10.1371/journal.pntd.0002573](https://doi.org/10.1371/journal.pntd.0002573) PMID: [24340116](https://pubmed.ncbi.nlm.nih.gov/24340116/); PubMed Central PMCID: PMC3854972.
  35. Singhal N, Kumar M, Kanaujia PK, Viridi JS. MALDI-TOF mass spectrometry: an emerging technology for microbial identification and diagnosis. Front Microbiol. 2015; 6:791. doi: [10.3389/fmicb.2015.00791](https://doi.org/10.3389/fmicb.2015.00791) PMID: [26300860](https://pubmed.ncbi.nlm.nih.gov/26300860/); PubMed Central PMCID: PMC4525378.
